# Supplementary material for: Conjugation of a Cationic Cell-Penetrating Peptide with a Novel Kunitzin-like Trypsin Inhibitor: New Insights for Enhancement of Peptide Bioactivities
Source: MDPI journal article supplement (doi:10.3390/pharmaceutics14091805), 2022-08-27
Supplement: s1 [file s1]

# Conjugation of a Cationic Cell-Penetrating Peptide with a Novel Kunitzin-Like Trypsin Inhibitor: New Insights for Enhancement of Peptide Bioactivities

Junting Yao <sup>1,†</sup>, Weining Yin <sup>1,†</sup>, Yuqing Chen <sup>1,2,†</sup>, Xiaoling Chen <sup>1,\*</sup>, Yangyang Jiang <sup>1</sup>, Tao Wang <sup>1</sup>, Chengbang Ma <sup>1</sup>, Mei Zhou <sup>1</sup>, Tianbao Chen <sup>1</sup>, Chris Shaw <sup>1</sup> and Lei Wang <sup>1,\*</sup>

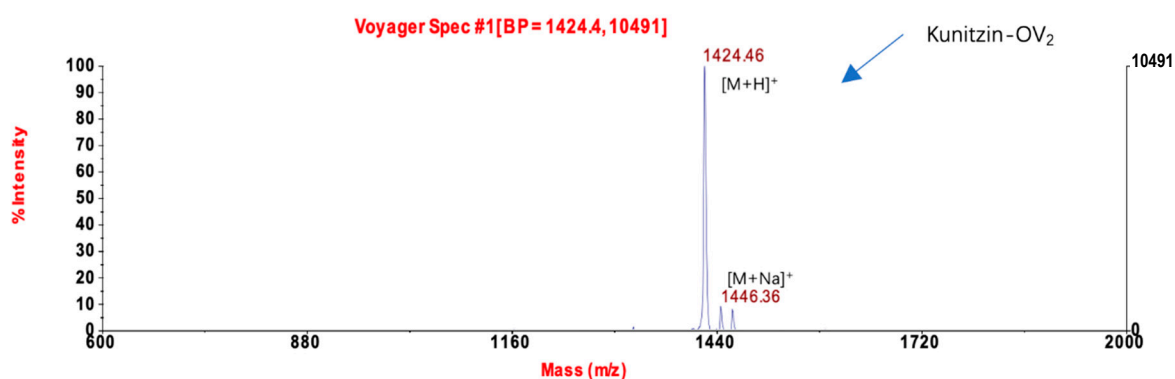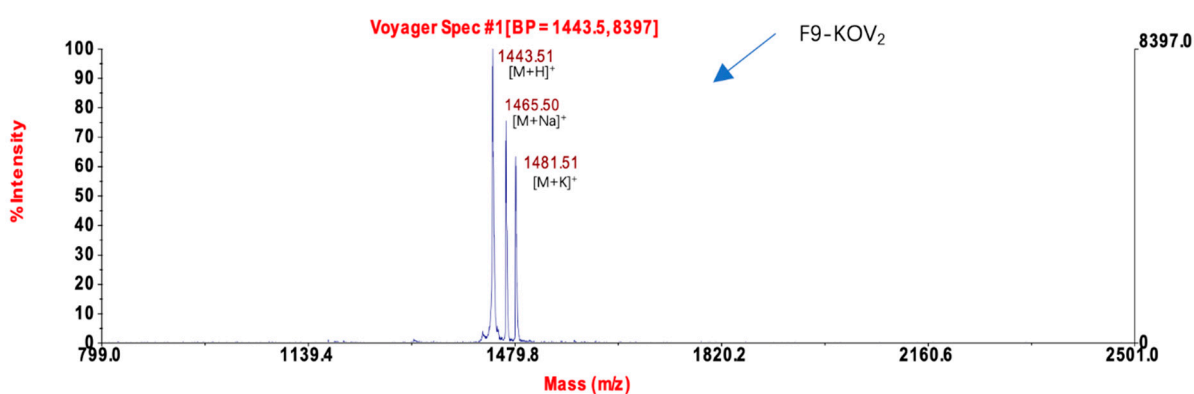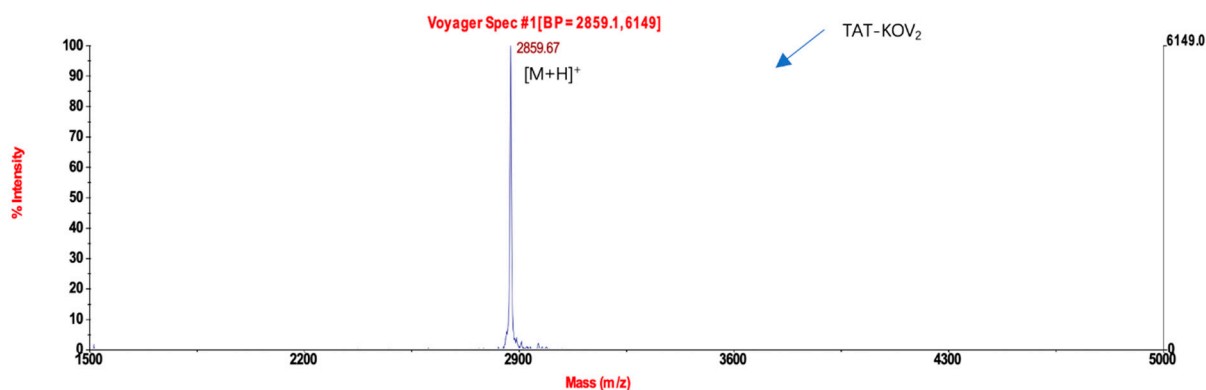

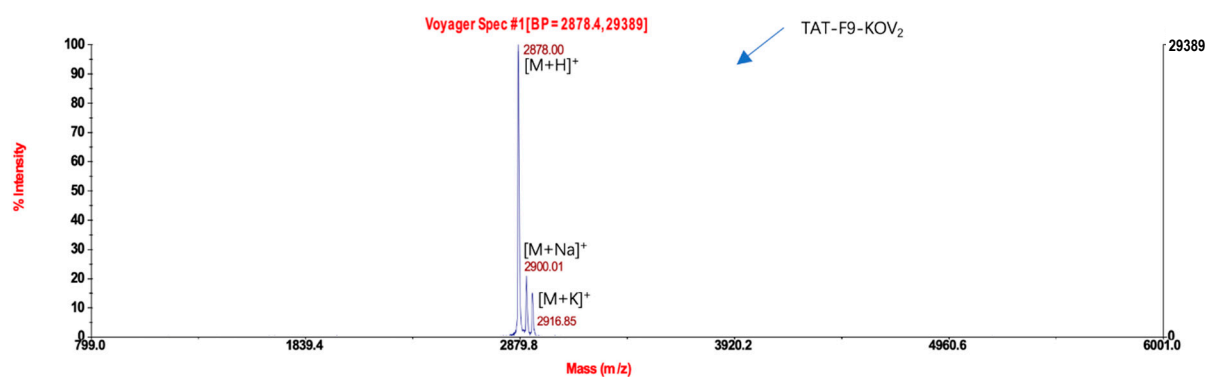

(D)

Figure S1: MALDI-TOF mass spectra of the purified peptides (A) kunitzin-OV<sub>2</sub>, (B) F9-KOV<sub>2</sub>, (C) TAT-KOV<sub>2</sub>, (D) TAT-F9-KOV<sub>2</sub>. The elution peak of each peptide is indicated by an arrow.

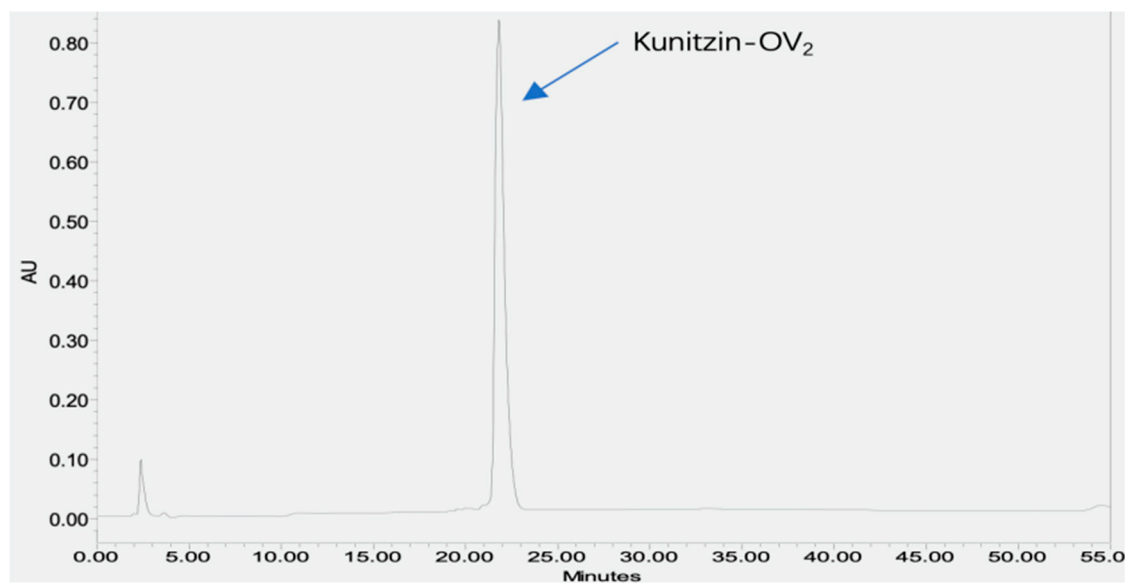

(A)

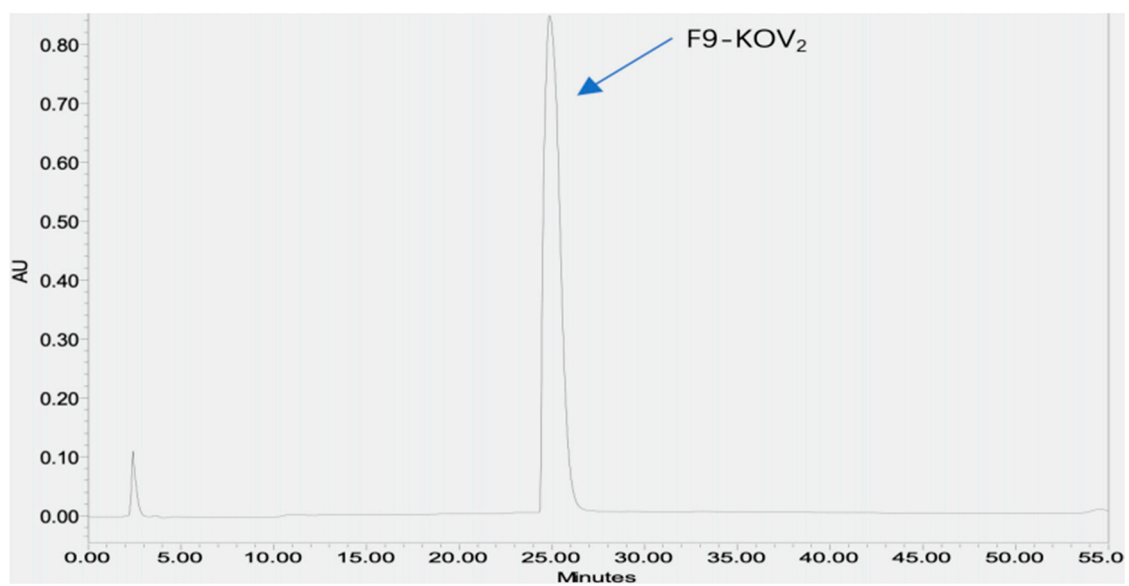

(B)

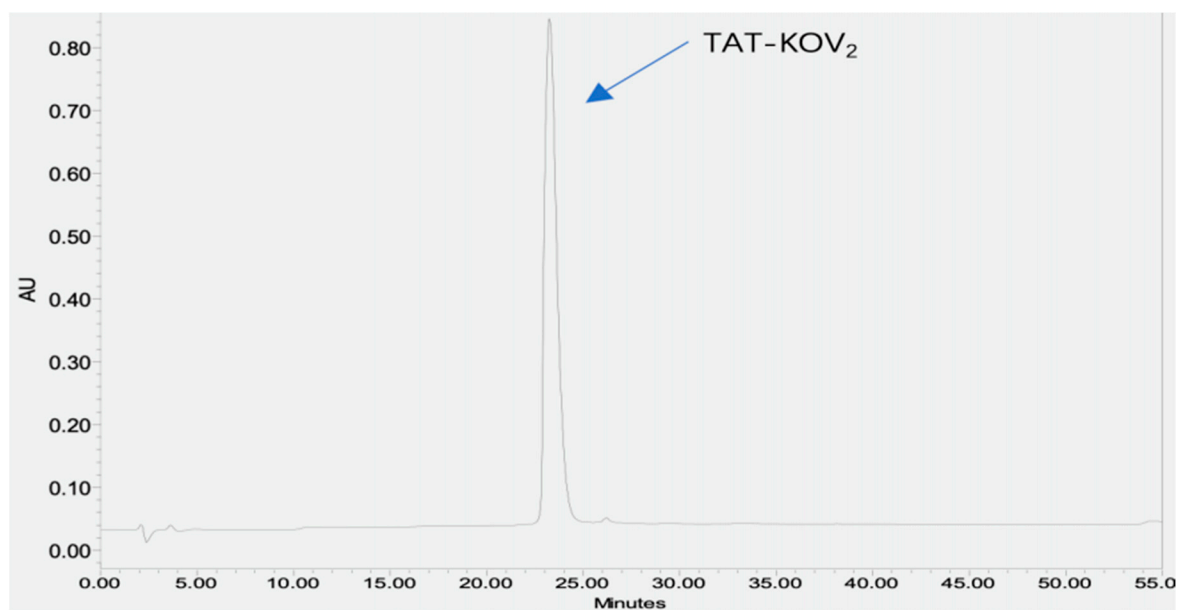

(C)

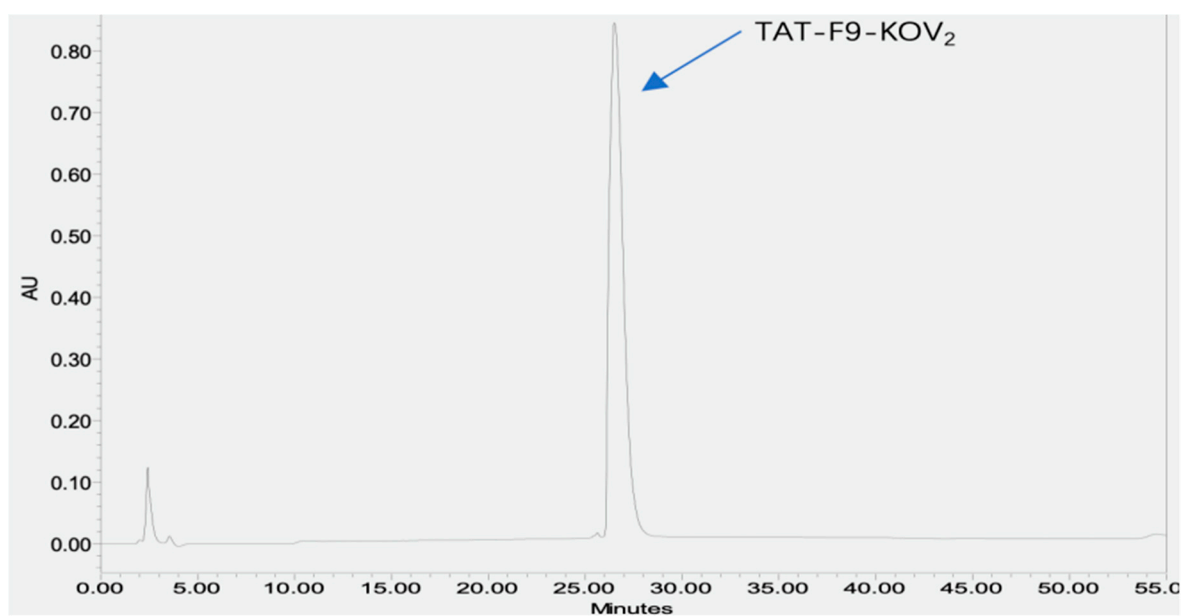

(D)

Figure S2: RP-HPLC chromatograms of purified peptides (A) kunitzin-OV<sub>2</sub>, (B) F9-KOV<sub>2</sub>, (C) TAT-KOV<sub>2</sub>, (D) TAT-F9-KOV<sub>2</sub>. The elution peak of each peptide is indicated by an arrow.
